# Supplementary material for: Amino acid 17 in QRDR of Gyrase A plays a key role in fluoroquinolones susceptibility in mycobacteria
Source: PubMed Central journal article supplement (PMC10715211; doi:10.1128/spectrum.02809-23), 2023-10-13
Supplement: reviewer-comments.pdf [file reviewer-comments.pdf]

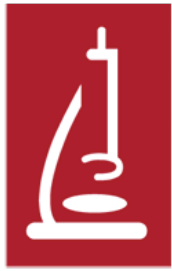

AMERICAN  
SOCIETY FOR  
MICROBIOLOGY

# Microbiology Spectrum

## Amino acid 17 in QRDR of Gyrase A plays a key role in fluoroquinolones susceptibility in Mycobacteria

Shuai Wang, Jingran Zhang, H.M. Adnan Hameed, Jie Ding, Ping Guan, Xiang Fang, Jiacong Peng, Biyi Su, Shangming Ma, Yaoju Tan, Gregory M. Cook, Guoliang Zhang, Yong-Ping Lin, Nanshan Zhong, Jinxing Hu, Jianxiong Liu, and Tianyu Zhang

*Corresponding Author(s): Tianyu Zhang, Guangzhou Institutes of Biomedicine and Health, Chinese Academy of Sciences*

---

### Review Timeline:

|                     |                 |
|---------------------|-----------------|
| Submission Date:    | July 9, 2023    |
| Editorial Decision: | July 25, 2023   |
| Revision Received:  | August 20, 2023 |
| Accepted:           | August 27, 2023 |

---

*Editor: Gyanu Lamichhane*

*Reviewer(s): The reviewers have opted to remain anonymous.*

### Transaction Report:

(Note: With the exception of the correction of typographical or spelling errors that could be a source of ambiguity, letters and reports are not edited. The original formatting of letters and referee reports may not be reflected in this compilation.)

**DOI:** <https://doi.org/10.1128/spectrum.02809-23>

July 25, 2023

Prof. Tianyu Zhang  
Guangzhou Institutes of Biomedicine and Health, Chinese Academy of Sciences  
State Key Laboratory of Respiratory Disease  
Room 207, 190 Kaiyuan Rd  
Science Park  
Guangzhou, Guangdong 510530  
China

Re: Spectrum02809-23 (Amino acid 17 in QRDR of Gyrase A plays a key role in fluoroquinolones susceptibility in Mycobacteria)

Dear Prof. Tianyu Zhang:

Thank you for submitting your manuscript to Microbiology Spectrum.

Two referees with expertise in mycobacteriology have reviewed your manuscript and provided helpful feedback for revision. In addition to revising the scientific content, it is also my assessment that the manuscript be edited for language use accuracy and clarity.

When submitting the revised version of your paper, please provide (1) point-by-point responses to the issues raised by the reviewers as file type "Response to Reviewers," not in your cover letter, and (2) a PDF file that indicates the changes from the original submission (by highlighting or underlining the changes) as file type "Marked Up Manuscript - For Review Only". Please use this link to submit your revised manuscript - we strongly recommend that you submit your paper within the next 60 days or reach out to me. Detailed instructions on submitting your revised paper are below.

Link Not Available

Below you will find instructions from the Microbiology Spectrum editorial office and comments generated during the review.

ASM policy requires that data be available to the public upon online posting of the article, so please verify all links to sequence records, if present, and make sure that each number retrieves the full record of the data. If a new accession number is not linked or a link is broken, provide production staff with the correct URL for the record. If the accession numbers for new data are not publicly accessible before the expected online posting of the article, publication of your article may be delayed; please contact the ASM production staff immediately with the expected release date.

The ASM Journals program strives for constant improvement in our submission and publication process. Please tell us how we can improve your experience by taking this quick [Author Survey](#).

Sincerely,

Gyanu Lamichhane

Editor, Microbiology Spectrum

Journals Department  
American Society for Microbiology  
1752 N St., NW  
Washington, DC 20036  
E-mail: [spectrum@asmusa.org](mailto:spectrum@asmusa.org)

Reviewer comments:

Reviewer #1 (Comments for the Author):

The authors experimentally addressed the role of specific amino acid residues within GyrA of *Mycobacterium abscessus* in fluorochinolone susceptibility. They altered amino acids associated with resistance in *M. tuberculosis* and investigated the phenotype of the recombinant strains. Besides single amino acid alterations, they also introduced double amino acid alterations.

Alterations at position 92 from A to S or G increased susceptibility, a phenotype which was reverted upon re-introduction of the original A. Susceptibility towards unrelated drugs was not affected. Although interesting, the manuscript is difficult to read. The figure from the supplement should be part of the main text, numbers of the amino acids should be indicated above the alignment (please check carefully with the numbers given in the legend). Alterations introduced and corresponding phenotypes should be indicated above the alignment. Which are the most prominent clinically acquired fluoroquinolone conferring alterations in *M. tuberculosis*. What are the predictions for other Mycobacteria. The two different numberings total positions and QRDR makes reading difficult.

Reviewer #2 (Comments for the Author):

In this paper, the researchers verified that gene-edited *M. abscessus* mutants bearing Ser/Gly at amino acid 17 of QRDRGyrA were more susceptible to fluoroquinolones than their parent strain and the revertant, which supports mycobacteria containing Ser/Gly at this position were more susceptible to fluoroquinolones than those containing Ala. This study outlines its scope and focus very clearly. It is well written and easy to understand. The results are presented in a simple-to-understand manner.

Here are some recommendations for the authors' consideration.

A) Lines 108-111: The researchers found that Ala17 in QRDRGyrA of *M. abscessus* plays a potential role in susceptibility to FQs, but the antibiotic resistance mechanism of *M. abscessus* is quite different from *M. tuberculosis*. Besides, *M. smegmatis* rather than *M. abscessus* is commonly used as the model organism of *M. tuberculosis*. Therefore, it is inappropriate to conclude that "clinical *M. tuberculosis* isolates containing Ala17Gly or Ala17Ser amino acid substitutions in QRDRGyrA may be preferentially treated with regimens containing FQs".

B) Line 189, Table 1: The MIC of MOX to the MabGyrAA92G (4 mg/L) were 1/2 of that of MabWT (8 mg/L), while the MIC of MOX to the MabGyrAA92G (2 mg/L) were 1/4 of that of MabWT (8 mg/L). According to the CLSI guideline, the moxifloxacin resistance breakpoint of *M. abscessus* was 4 mg/L, thus MabGyrAA92G and MabWT were both resistant to moxifloxacin. There might be differences in fluoroquinolones susceptibility in *M. abscessus* mutants bearing Ser and Gly at this position and this is recommended for discussion.

Staff Comments:

### Preparing Revision Guidelines

To submit your modified manuscript, log onto the eJP submission site at <https://spectrum.msubmit.net/cgi-bin/main.plex>. Go to Author Tasks and click the appropriate manuscript title to begin the revision process. The information that you entered when you first submitted the paper will be displayed. Please update the information as necessary. Here are a few examples of required updates that authors must address:

- Point-by-point responses to the issues raised by the reviewers in a file named "Response to Reviewers," NOT IN YOUR COVER LETTER.
- Upload a compare copy of the manuscript (without figures) as a "Marked-Up Manuscript" file.
- Each figure must be uploaded as a separate file, and any multipanel figures must be assembled into one file.
- Manuscript: A .DOC version of the revised manuscript
- Figures: Editable, high-resolution, individual figure files are required at revision, TIFF or EPS files are preferred

For complete guidelines on revision requirements, please see the journal Submission and Review Process requirements at <https://journals.asm.org/journal/Spectrum/submission-review-process>. **Submissions of a paper that does not conform to Microbiology Spectrum guidelines will delay acceptance of your manuscript. "**

Please return the manuscript within 60 days; if you cannot complete the modification within this time period, please contact me. If you do not wish to modify the manuscript and prefer to submit it to another journal, please notify me of your decision immediately so that the manuscript may be formally withdrawn from consideration by Microbiology Spectrum.

If your manuscript is accepted for publication, you will be contacted separately about payment when the proofs are issued; please follow the instructions in that e-mail. Arrangements for payment must be made before your article is published. For a complete list of **Publication Fees**, including supplemental material costs, please visit our [website](#).

Corresponding authors may [join or renew ASM membership](#) to obtain discounts on publication fees. Need to upgrade your membership level? Please contact Customer Service at [Service@asmusa.org](mailto:Service@asmusa.org).

Thank you for submitting your paper to Microbiology Spectrum.

**Title:** Amino acid 17 in QRDR of Gyrase A plays a key role in fluoroquinolones susceptibility in Mycobacteria

**ID:** Spectrum02809-23

20<sup>th</sup> August, 2023

Dear Editor and Reviewers:

Thank you for your time and effort in providing us valuable suggestions to improve our manuscript entitled “Amino acid 17 in QRDR of Gyrase A plays a key role in fluoroquinolones susceptibility in Mycobacteria” (ID: Spectrum02809-23). We have carefully addressed all the comments and made corrections accordingly, so now we hope that the modified manuscript can finally be considered for publication in your esteemed journal.

The main corrections are marked in red in the revised manuscript. Responses to the reviewer’s comments are as follows:

**Reviewer #1 (Comments for the Author):**

The authors experimentally addressed the role of specific amino acid residues within GyrA of *Mycobacterium abscessus* in fluoroquinolone susceptibility. They altered amino acids associated with resistance in *M. tuberculosis* and investigated the phenotype of the recombinant strains. Besides single amino acid alterations, they also introduced double amino acid alterations. Alterations at position 92 from A to S or G increased susceptibility, a phenotype which was reverted upon re-introduction of the original A. Susceptibility towards unrelated drugs was not affected. Although interesting, the manuscript is difficult to read. The figure from the supplement should be part of the main text, numbers of the amino acids should be indicated above the alignment (please check carefully with the numbers given in the legend). Alterations introduced and corresponding phenotypes should be indicated above the alignment. Which are the most prominent clinically acquired fluoroquinolone conferring alterations in *M. tuberculosis*. What are the predictions for other Mycobacteria. The two different numberings total positions and QRDR makes reading difficult.

A) The figure from the supplement should be part of the main text, numbers of the amino acids should be indicated above the alignment (please check carefully with the numbers given in the legend). Alterations introduced and corresponding phenotypes should be indicated above the alignment.

**Authors' response:**

First of all, we are thankful to the reviewer for your clear understanding and describing the precise theme of our study. Thanks for your suggestion. Figure S1 is now moved to the main text of the revised manuscript which is now marked as 'Figure 1A'. Alterations introduced and corresponding phenotypes have been indicated above the alignment in 'Figure 1A'. We have modified the figure and its legend.

B) Which are the most prominent clinically acquired fluoroquinolone conferring alterations in *M. tuberculosis*. What are the predictions for other Mycobacteria.

**Authors' response:** We acknowledge your concern, in fact, only A17G of QRDR<sup>GyrA</sup> conferring fluoroquinolone hypersensitivity was found in clinical *M. tuberculosis* isolates. For other Mycobacteria, we hypothesized that A17S or A17G of QRDR<sup>GyrA</sup> could cause hypersensitivity to fluoroquinolones. Therefore, the *Mycobacterium peregrinum*, *Mycobacterium fortuitum* and *Mycobacterium aurum* are more susceptible to fluoroquinolones than others because of the presence of a Ser at position 17 of QRDR<sup>GyrA</sup> in these three mycobacteria. We have also described this in the revised manuscript (Lines 117-118).

C) The two different numberings total positions and QRDR makes reading difficult.

**Authors' response:** Thank you for pointing out this problem in manuscript. We have revised the numbering of the full text and uniformly use the QRDR<sup>GyrA</sup> to indicate the editing sites in the revised manuscript.

**Reviewer #2 (Comments for the Author):**

In this paper, the researchers verified that gene-edited *M. abscessus* mutants bearing Ser/Gly at amino acid 17 of QRDR<sup>GyrA</sup> were more susceptible to fluoroquinolones than their parent strain and the revertant, which supports mycobacteria containing Ser/Gly at this position were more susceptible to fluoroquinolones than those containing Ala.

This study outlines its scope and focus very clearly. It is well written and easy to understand. The results are presented in a simple-to-understand manner.

Here are some recommendations for the authors' consideration.

A) Lines 108-111: The researchers found that Ala17 in QRDR<sup>GyrA</sup> of *M. abscessus* plays a potential role in susceptibility to FQs, but the antibiotic resistance mechanism of *M. abscessus* is quite different from *M. tuberculosis*. Besides, *M. smegmatis* rather than *M. abscessus* is commonly used as the model organism of *M. tuberculosis*. Therefore, it is inappropriate to conclude that "clinical *M. tuberculosis* isolates containing Ala17Gly or Ala17Ser amino acid substitutions in QRDR<sup>GyrA</sup> may be preferentially treated with regimens containing FQs".

**Authors' response:** We are grateful to the reviewer for appreciating our work and thanks for your productive recommendations for improving our manuscript. We have modified the concerned text section in the revised manuscript (Lines 117-118).

B) Line189, Table 1: The MIC of MOX to the Mab<sup>GyrAA92G</sup> (4 mg/L) was 1/2 of that of Mab<sup>WT</sup> (8 mg/L), while the MIC of MOX to the Mab<sup>GyrAA92S</sup> (2 mg/L) was 1/4 of that of Mab<sup>WT</sup> (8 mg/L). According to the CLSI guideline, the moxifloxacin resistance breakpoint of *M. abscessus* was 4 mg/L, thus Mab<sup>GyrAA92G</sup> and Mab<sup>WT</sup> were both resistant to moxifloxacin. There might be differences in fluoroquinolones susceptibility in *M. abscessus* mutants bearing Ser and Gly at this position and this is recommended for discussion.

**Authors' response:** We gratefully appreciate your valuable suggestion. We have also described this in the discussion section of the revised manuscript (Lines 124-129).



August 27, 2023

Prof. Tianyu Zhang  
Guangzhou Institutes of Biomedicine and Health, Chinese Academy of Sciences  
State Key Laboratory of Respiratory Disease  
Room 207, 190 Kaiyuan Rd  
Science Park  
Guangzhou, Guangdong 510530  
China

Re: Spectrum02809-23R1 (Amino acid 17 in QRDR of Gyrase A plays a key role in fluoroquinolones susceptibility in Mycobacteria)

Dear Prof. Tianyu Zhang:

Your manuscript has been accepted, and I am forwarding it to the ASM Journals Department for publication. You will be notified when your proofs are ready to be viewed.

The ASM Journals program strives for constant improvement in our submission and publication process. Please tell us how we can improve your experience by taking this quick [Author Survey](#).

**Publication Fees:** We have partnered with Copyright Clearance Center to collect author charges. You will soon receive a message from no-reply@copyright.com with further instructions. For questions related to paying charges through RightsLink, please contact Copyright Clearance Center by email at [ASM\\_Support@copyright.com](mailto:ASM_Support@copyright.com) or toll free at +1.877.622.5543. Hours of operation: 24 hours per day, 7 days per week. Copyright Clearance Center makes every attempt to respond to all emails within 24 hours. For a complete list of **Publication Fees**, including supplemental material costs, please visit our [website](#).

ASM policy requires that data be available to the public upon online posting of the article, so please verify all links to sequence records, if present, and make sure that each number retrieves the full record of the data. If a new accession number is not linked or a link is broken, provide production staff with the correct URL for the record. If the accession numbers for new data are not publicly accessible before the expected online posting of the article, publication of your article may be delayed; please contact the ASM production staff immediately with the expected release date.

Corresponding authors may [join or renew ASM membership](#) to obtain discounts on publication fees. Need to upgrade your membership level? Please contact Customer Service at [Service@asmusa.org](mailto:Service@asmusa.org).

Thank you for submitting your paper to Spectrum.

Sincerely,

Gyanu Lamichhane  
Editor, Microbiology Spectrum

Journals Department  
American Society for Microbiology  
1752 N St., NW  
Washington, DC 20036  
E-mail: [spectrum@asmusa.org](mailto:spectrum@asmusa.org)
